# Supplementary material
Source: Springer Nature journal article supplement (https://www.springermedizin.de/resource/supplementary/12985_2009_606_MOESM2_ESM.pdf/9608554)

Mock

Pre-immune serum

FITC+DAPI

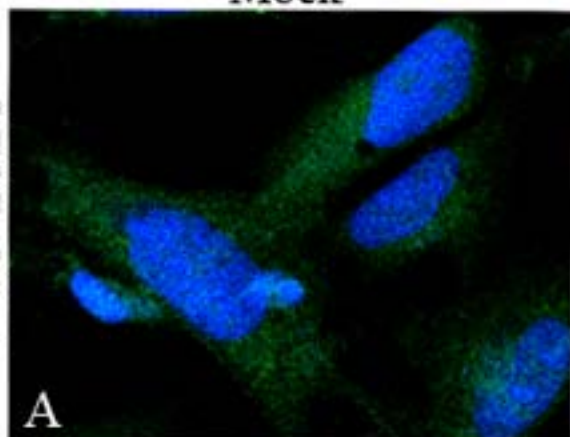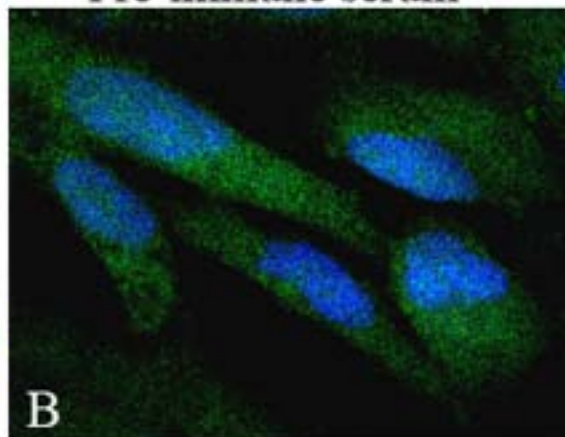

FITC+DAPI

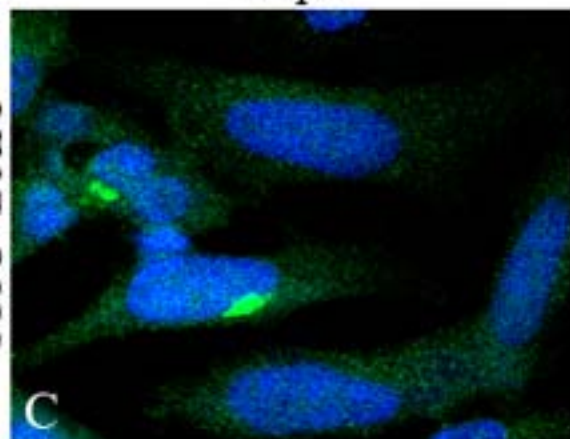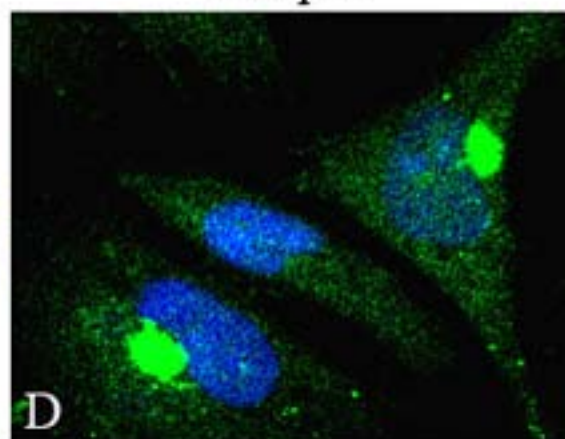

FITC+DAPI

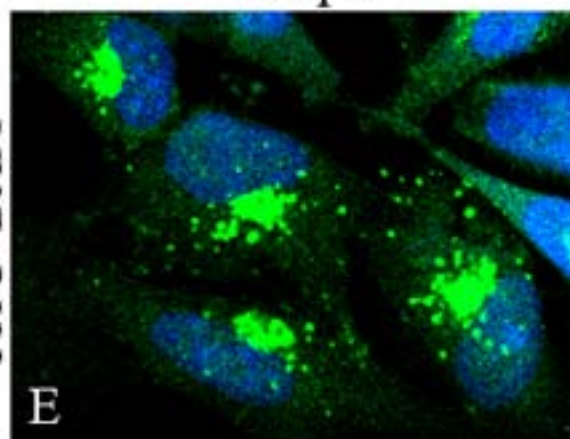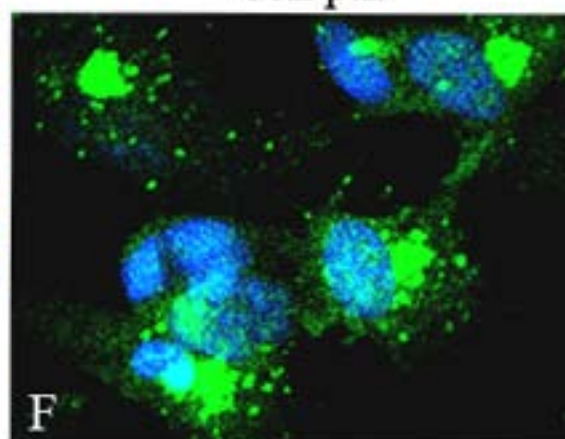

Supplement: MOESM2 [file 9608554]
